# Supplementary material for: Protein kinase 2 of the giant sarcomeric protein UNC-89 regulates mitochondrial morphology and function
Source: PubMed Central journal article supplement — Commun Biol. 2024 Oct 17;7:1342. doi: 10.1038/s42003-024-07042-3 (PMC11487192; doi:10.1038/s42003-024-07042-3), 2024-10-17
Supplement: 42003_2024_7042_MOESM3_ESM.pdf [file 42003_2024_7042_MOESM3_ESM.pdf]

## Description of Additional Supplementary Files

**File name:** Supplementary Data

**Description:** Numerical source data for graphs
